# Supplementary material for: High and Increasing Oxa-51 DNA Load Predict Mortality in Acinetobacter baumannii Bacteremia: Implication for Pathogenesis and Evaluation of Therapy
Source: PubMed Central journal article supplement (PMC2994729; doi:10.1371/journal.pone.0014133), 2010-11-30

# Study design

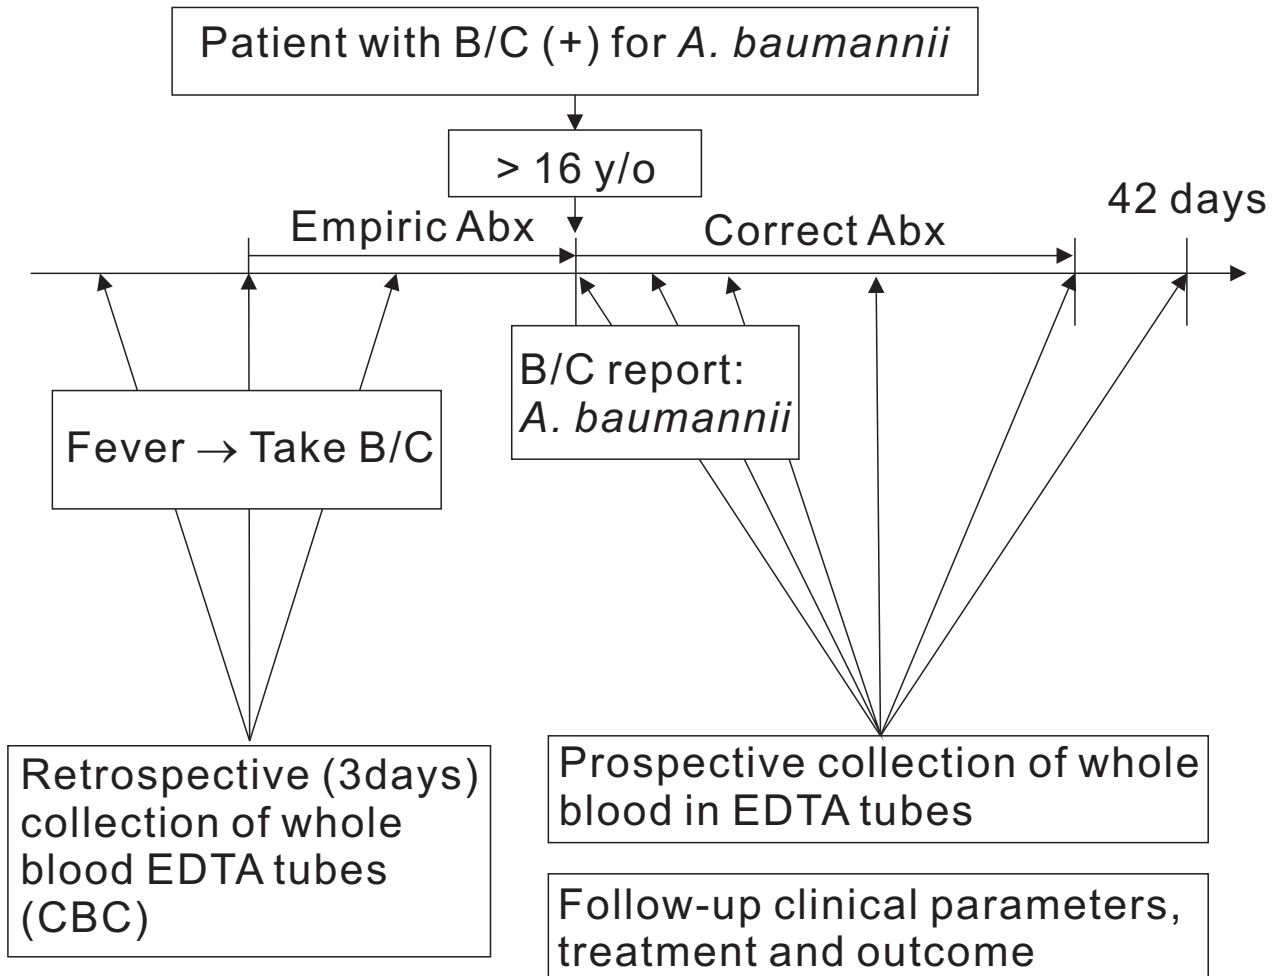

Supplement: pone.0014133.s002.pdf [file pone.0014133.s002.pdf]
